# Supplementary material for: Long non-coding RNA Malat1 promotes gallbladder cancer development by acting as a molecular sponge to regulate miR-206
Source: PubMed Central journal article supplement (PMC5122355; doi:10.18632/oncotarget.9347), 2016-05-13
Supplement: oncotarget-07-37857-s001.pdf [file oncotarget-07-37857-s001.pdf]

## Long non-coding RNA Malat1 promotes gallbladder cancer development by acting as a molecular sponge to regulate miR-206

### Supplementary Materials

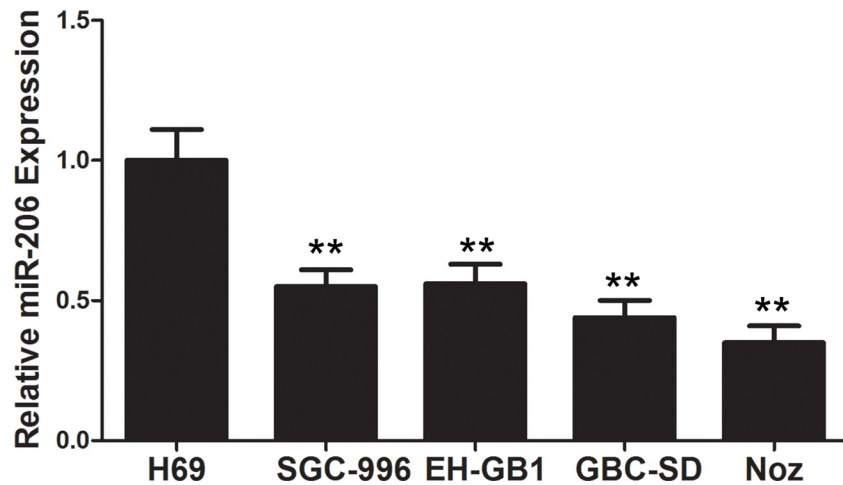

Supplementary Figure S1: MiR-206 expression in GBC and normal biliary epithelial cell lines: Relative expression levels of miR-206 in normal cell H69 or four indicated GBC cells,  $**P < 0.05$ .

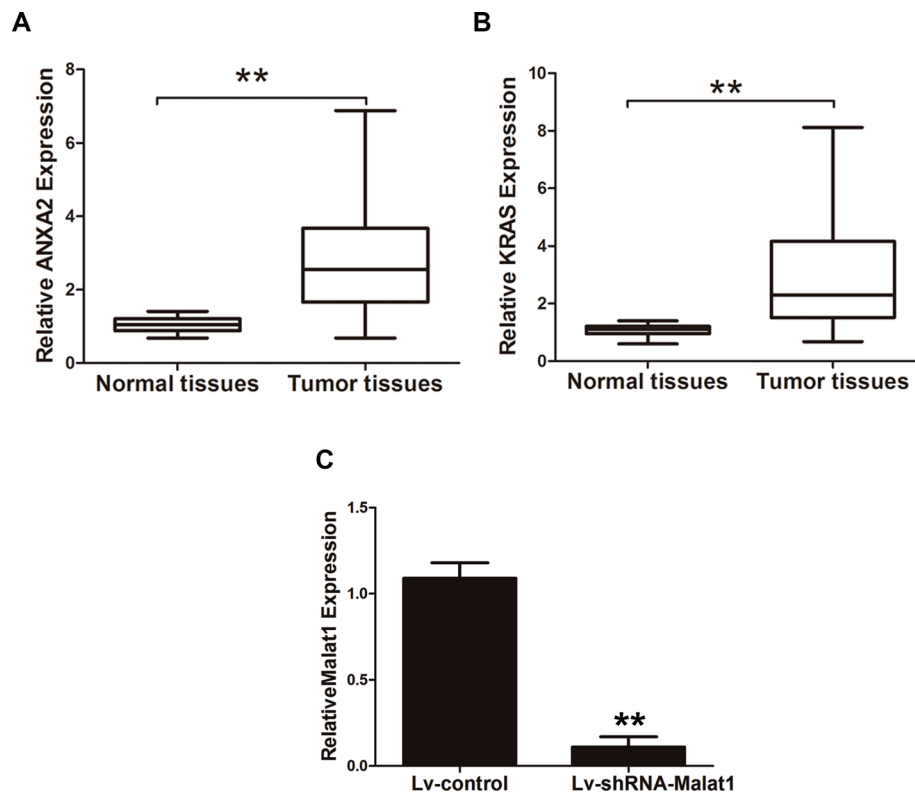

Supplementary Figure S2: (A) The transcriptional levels of ANXA2 in GBC tissue compared to normal match gallbladder tissue,  $**P < 0.05$ . (B) The transcriptional levels of KRAS in GBC tissue compared to normal match gallbladder tissue,  $**P < 0.05$ . (C) The expression levels of Malat1 transfected with Lv-shRNA-Malat1 compared to the Lv-control group in NOZ cells.  $**P < 0.05$ .

**Supplementary Table S1: MiRNA fold change in responses to Malat1 knockdown in NOZ cells**

| <b>miRNA</b>    | <b>fold change</b> |
|-----------------|--------------------|
| hsa-miR-370-3p  | 0.98               |
| hsa-miR-503-5p  | 1.25               |
| hsa-miR-378a-3p | 1.41               |
| hsa-miR-506-3p  | 1.22               |
| hsa-miR-135b-5p | 1.55               |
| hsa-miR-203a    | 1.38               |
| hsa-miR-216a-5p | 1.14               |
| hsa-miR-26b-5p  | 0.88               |
| hsa-miR-185-5p  | 1.21               |
| hsa-miR-206     | 2.78               |
| hsa-miR-455-5p  | 1.1                |
| hsa-miR-363-3p  | 2.4                |
| hsa-miR-146b-5p | 0.91               |
| hsa-miR-378c    | 0.99               |
| hsa-miR-141-3p  | 1.65               |
| hsa-miR-26a-5p  | 1.33               |
| hsa-miR-135a-5p | 1.52               |
| hsa-miR-494-3p  | 1.35               |
| hsa-miR-194-5p  | 1.88               |
| hsa-miR-140-5p  | 1.44               |
| hsa-miR-22-3p   | 1.2                |
| hsa-miR-142-3p  | 0.9                |
| hsa-miR-143-3p  | 1.78               |
| hsa-miR-145-5p  | 1.12               |
| hsa-miR-202-3p  | 1.89               |
| hsa-miR-491-5p  | 0.78               |
| hsa-miR-485-5p  | 1.66               |
| hsa-miR-154-5p  | 1.46               |
| hsa-miR-211-5p  | 1.53               |
| hsa-miR-101-3p  | 1.34               |
| hsa-miR-613     | 1.58               |
| hsa-miR-519d-3p | 1.48               |
| hsa-miR-204-5p  | 1.25               |
